# Supplementary material for: Identification of Key Transcription Factors AP-1 and AP-1-Dependent miRNAs Forming a Co-Regulatory Network Controlling PTEN in Liver Ischemia/Reperfusion Injury
Source: Biomed Res Int. 2019 Nov 5;2019:8962682. doi: 10.1155/2019/8962682 (PMC6875376; doi:10.1155/2019/8962682)
Supplement: Supplementary Materials — See the Supplementary Material for comprehensive image analysis. [file 8962682.f1.xlsx]

## Sheet: IR related gene
I/R related gene
EDN1
SULT1E1
PTEN
HMOX1
NOS2
TICAM1
SIRT7
SOD2
MYD88
PPARA
ALOX5
IL10
ATF3
PLAT
CXCL2
SOD1
HBEGF
BCL2
FGF2
MAPK8
ADORA2A
THBS1
CAV1
SLC9A1
CYBB
IL6ST
AGT
CXCL1
PPARG
RELA
HIF1A
HSPA8
SOCS1
NOS3
MAPK9
EGR1
SELE
AKT1S1
ADORA2B
NFE2L2
TLR4
MAPK14
AOC3
TNF
EGF
IL1A
CDKN1A
MPO
STAT3
ADM
PTGS2
IL1B
LCN2
PTGS1
TLR2
GPX1
CCL3
EPO
CCL2
HGF
IL6
CASP3
MMP9

## Sheet: Fig1A DEGs
Ish_30min vs Sham DEGs
Cxcl1
Upp2
Il1r1
Cyp2b10
Gpcpd1
Gm20186
Fkbp5
Socs3
Id2
Por
Hectd2
Rapgef4
Slc25a25
Zbtb16
Nr6a1
Klf10
Arhgef26
Rabgef1
Junb
Retreg1
Slc25a32
Inhbb
Slc39a14
Dusp6
1810055G02Rik
Fbxo31
Mt2
Map3k5
St3gal5
Fosl2
Rprd2
Gja4
Gja1

## Sheet: Fig1B DEGs
Ish_90min and Ish_90min_rpf DEGs
Hspa1a
Ccn1
Dnajb1
Thbs1
Nfkbiz
Hspa1b
Ch25h
Atf3
Gm20186
Csf1r
Ppbp
Hspa8
Snord14d
Snord14e
Egr2
Id2
Socs3
Rgs4
Hspb1
Hsp25-ps1
Nr4a1
Klf6
C1qa
Selp
Jmjd1c
Vsig4
Marco
Ctla2a
Adgre4
Cd5l
Adamts1
Adamts4
Clec4f
Ier3
C1qc
Gm6212
Cd24a
C1qb
Egr3
Cxcl1
Fosl2
Junb
Ier5
Fos
Jun
Ctss
Rhob
Gadd45b
Cybb
Lyz2
Lyz1

## Sheet: Fig1C DEGs
Ish_90min_rpf and sham DEGs
Hspa1a
Ccn1
Jun
Abcc9
Dnajb1
Ppbp
Atf3
Rapgef4
Il1r1
Thbs1
Adamdec1
Cd163
Fos
Upp2
Mylip
Ap3m1
Ap3m1-ps
Reln
Atl2
Crbn
Vsig4
Serinc3
Ptprb
Fcna
Dcn
Cd5l
Hspa1b
Cyp2b10
Hspa8
Snord14d
Snord14e
Mrc1
Ecm1
Mir7014
Cybb
Jmjd1c
Csf1r
C1qa
Gskip
Nr4a1
Fkbp5
Lyz2
Lyz1
Adgre4
Plxnc1
Gm6212
Cd24a
Folr2
Egr2
Dusp1
Gfra1
Snca
Chka
Dusp6
C1qc
Clec4a3
Treml4
Oit3
Timd4
Saa4
Rgs5
C1qb
Lpin2
Colec10
Ndel1
Cd68
Colec11
Tgfbi
Klf6
Btg2
Ly86
Pum1
Zfp36l1
Phip
Wfdc17
Por
Egr3
Slc25a25
Slc20a1
Clec4g
Adamts1
Adgrf5
Clec4f
Fcgr3
Rbpms
Gm49345
Zfp729b
Gpcpd1
Tfpi
Dhcr24
Fabp7
Slco1b2
Steap4
Zfp748
Ednrb
Etnppl
Dusp16
Axl
Malat1
Clec1b
Cd38
Nfkbiz
Hbp1
Thrap3
Slc9a9
Fosb
Cd44
Cpn1
Ctss
6030400A10Rik
Selp
Gbp2b
Cd53
Cxcl13
Gm47644
Map3k5
Mtss1
Brd4
Desi2
5330406M23Rik
Ncor1
St3gal5
Gm43289
Id2
Fbxo31
Ms4a6d
Mid1ip1
Ifrd1
Lrat
Rhob
Ctla2a
Zbtb16
Ier2
Car3
1810055G02Rik
Ccl6
Clec4n
Adgre1
Fst
Rbm39
Cyp2a4
Cyp2a5
Cyp2a21-ps
Col1a1
Rbbp4
Gmfb
Ms4a6b
Ier3
Crebbp
Hspb1
Hsp25-ps1
Kctd12
S100a9
Hsd3b3
Dock10
Il6
Gucy1a1
Gck
Srrm2
Vcam1
Gdap10
Lyve1
Eif4ebp3
Klf13
Kif1b
Mup9
Mup10
Ear1
Ear10
Ear-ps2
Ear2
Dbp
Sfpq
Ier5
Gadd45g
Marco
Gm44576
Hbs1l
Gm9923
Herpud1
Tbx3

## Sheet: Fig2A
JUN	GPCPD1	Yellow
JUN	EIF4EBP3	Yellow
JUN	FOS	Yellow
JUN	MAP3K5	Yellow
JUN	ST3GAL5	Yellow
JUN	SLC25A25	Yellow
JUN	SRRM2	Yellow
JUN	RABGEF1	Yellow
JUN	PUM1	Yellow
JUN	RHOB	Yellow
JUN	IFRD1	Yellow
JUN	DHCR24	Yellow
JUN	NFKBIZ	Yellow
JUN	EGR3	Yellow
JUN	ADGRE1	Yellow
JUN	EGR2	Yellow
JUN	RBBP4	Yellow
JUN	SOCS3	Yellow
JUN	SAA4	Yellow
JUN	TIMD4	Yellow
JUN	CTSS	Yellow
JUN	MID1IP1	Yellow
JUN	FOSB	Yellow
JUN	LPIN2	Yellow
JUN	POR	Yellow
JUN	JUNB	Yellow
JUN	SLC25A32	Yellow
JUN	RBPMS	Yellow
JUN	NDEL1	Yellow
JUN	KIF1B	Yellow
JUN	BTG2	Yellow
JUN	GADD45G	Yellow
JUN	TFPI	Yellow
JUN	HSPB1	Yellow
JUN	RBM39	Yellow
JUN	JMJD1C	Yellow
JUN	GADD45B	Yellow
JUN	ADAMTS4	Yellow
JUN	SLC39A14	Yellow
JUN	CHKA	Yellow
JUN	FKBP5	Yellow
JUN	PHIP	Yellow
JUN	ZFP36L1	Yellow
JUN	SERINC3	Yellow
JUN	CD68	Yellow
JUN	AP3M1	Yellow
JUN	DUSP16	Yellow
JUN	HECTD2	Yellow
JUN	HBP1	Yellow
JUN	PTPRB	Yellow
JUN	KLF6	Yellow
JUN	HERPUD1	Yellow
JUN	KLF13	Yellow
JUN	KLF10	Yellow
JUN	NR4A1	Yellow
JUN	CD5L	Yellow
JUN	ECM1	Yellow
JUN	GMFB	Yellow
JUN	DESI2	Yellow
JUN	LYVE1	Yellow
JUN	CRBN	Yellow
JUN	DUSP1	Yellow
JUN	RPRD2	Yellow
JUN	DBP	Yellow
JUN	SFPQ	Yellow
JUN	RGS5	Yellow
JUN	THRAP3	Yellow
JUN	FBXO31	Yellow
JUN	DNAJB1	Yellow
JUN	KCTD12	Yellow
JUN	DUSP6	Yellow
JUN	CCL2	blue
JUN	TNF	blue
JUN	ADORA2B	blue
JUN	IL6ST	blue
JUN	CXCL2	blue
JUN	EDN1	blue
JUN	TLR4	blue
JUN	PTEN	blue
JUN	IL10	blue
JUN	GPX1	blue
JUN	CASP3	blue
JUN	AKT1S1	blue
JUN	AGT	blue
JUN	BCL2	blue
JUN	TICAM1	blue
JUN	NOS3	blue
JUN	NOS2	blue
JUN	FGF2	blue
JUN	IL1A	blue
JUN	EGR1	blue
JUN	PLAT	blue
JUN	RELA	blue
JUN	SOCS1	blue
JUN	SIRT7	blue
JUN	STAT3	blue
JUN	HIF1A	blue
JUN	MAPK14	blue
JUN	MAPK9	blue
JUN	HBEGF	blue
JUN	NFE2L2	blue
JUN	ALOX5	blue
JUN	SLC9A1	blue
FOS	CAV1	blue
FOS	CCL3	blue
FOS	CCL2	blue
FOS	PTGS2	blue
FOS	IL6ST	blue
FOS	MMP9	blue
FOS	CXCL2	blue
FOS	EDN1	blue
FOS	PPARG	blue
FOS	TLR4	blue
FOS	PTEN	blue
FOS	IL10	blue
FOS	GPX1	blue
FOS	CASP3	blue
FOS	MYD88	blue
FOS	AKT1S1	blue
FOS	AGT	blue
FOS	HMOX1	blue
FOS	TICAM1	blue
FOS	IL1B	blue
FOS	NOS3	blue
FOS	SULT1E1	blue
FOS	EGF	blue
FOS	FGF2	blue
FOS	IL1A	blue
FOS	EGR1	blue
FOS	PLAT	blue
FOS	RELA	blue
FOS	SOCS1	blue
FOS	SIRT7	blue
FOS	SOD1	blue
FOS	STAT3	blue
FOS	SOD2	blue
FOS	LCN2	blue
FOS	CDKN1A	blue
FOS	HIF1A	blue
FOS	ADM	blue
FOS	MAPK14	blue
FOS	HBEGF	blue
FOS	MAPK9	blue
FOS	MAPK8	blue
FOS	NFE2L2	blue
FOS	SELE	blue
FOS	SLC9A1	blue
ATF3	CAV1	blue
ATF3	PTGS2	blue
ATF3	IL6ST	blue
ATF3	EDN1	blue
ATF3	CXCL2	blue
ATF3	PTEN	blue
ATF3	GPX1	blue
ATF3	AKT1S1	blue
ATF3	HMOX1	blue
ATF3	NOS3	blue
ATF3	FGF2	blue
ATF3	EGR1	blue
ATF3	RELA	blue
ATF3	SOD1	blue
ATF3	STAT3	blue
ATF3	LCN2	blue
ATF3	HIF1A	blue
ATF3	ADM	blue
ATF3	MAPK14	blue
ATF3	HBEGF	blue
ATF3	MAPK9	blue
ATF3	NFE2L2	blue
ATF3	SLC9A1	blue
ATF3	IL6	red
ATF3	HSPA8	red
FOS	CXCL1	red
FOS	IL6	red
FOS	ATF3	red
FOS	THBS1	red
FOS	HSPA8	red
JUN	CYBB	red
JUN	IL6	red
JUN	ATF3	red
JUN	THBS1	red
JUN	HSPA8	red

## Sheet: Fig2C
Source	Target	Intereaction
ATF3	ADM	TF_Target
ATF3	AKT1S1	TF_Target
ATF3	CAV1	TF_Target
ATF3	CXCL2	TF_Target
ATF3	EDN1	TF_Target
ATF3	EGR1	TF_Target
ATF3	FGF2	TF_Target
ATF3	GPX1	TF_Target
ATF3	HBEGF	TF_Target
ATF3	HIF1A	TF_Target
ATF3	HMOX1	TF_Target
ATF3	IL6ST	TF_Target
ATF3	LCN2	TF_Target
ATF3	MAPK14	TF_Target
ATF3	MAPK9	TF_Target
ATF3	NFE2L2	TF_Target
ATF3	NOS3	TF_Target
ATF3	PTEN	TF_Target
ATF3	PTGS2	TF_Target
ATF3	RELA	TF_Target
ATF3	SLC9A1	TF_Target
ATF3	SOD1	TF_Target
ATF3	STAT3	TF_Target
FOS	ADM	TF_Target
FOS	AGT	TF_Target
FOS	AKT1S1	TF_Target
FOS	CASP3	TF_Target
FOS	CAV1	TF_Target
FOS	CCL2	TF_Target
FOS	CCL3	TF_Target
FOS	CDKN1A	TF_Target
FOS	CXCL2	TF_Target
FOS	EDN1	TF_Target
FOS	EGF	TF_Target
FOS	EGR1	TF_Target
FOS	FGF2	TF_Target
FOS	GPX1	TF_Target
FOS	HBEGF	TF_Target
FOS	HIF1A	TF_Target
FOS	HMOX1	TF_Target
FOS	IL10	TF_Target
FOS	IL1A	TF_Target
FOS	IL1B	TF_Target
FOS	IL6ST	TF_Target
FOS	LCN2	TF_Target
FOS	MAPK14	TF_Target
FOS	MAPK8	TF_Target
FOS	MAPK9	TF_Target
FOS	MMP9	TF_Target
FOS	MYD88	TF_Target
FOS	NFE2L2	TF_Target
FOS	NOS3	TF_Target
FOS	PLAT	TF_Target
FOS	PPARG	TF_Target
FOS	PTEN	TF_Target
FOS	PTGS2	TF_Target
FOS	RELA	TF_Target
FOS	SELE	TF_Target
FOS	SIRT7	TF_Target
FOS	SLC9A1	TF_Target
FOS	SOCS1	TF_Target
FOS	SOD1	TF_Target
FOS	SOD2	TF_Target
FOS	STAT3	TF_Target
FOS	SULT1E1	TF_Target
FOS	TICAM1	TF_Target
FOS	TLR4	TF_Target
JUN	ADORA2B	TF_Target
JUN	AGT	TF_Target
JUN	AKT1S1	TF_Target
JUN	ALOX5	TF_Target
JUN	BCL2	TF_Target
JUN	CASP3	TF_Target
JUN	CCL2	TF_Target
JUN	CXCL2	TF_Target
JUN	EDN1	TF_Target
JUN	EGR1	TF_Target
JUN	FGF2	TF_Target
JUN	GPX1	TF_Target
JUN	HBEGF	TF_Target
JUN	HIF1A	TF_Target
JUN	IL10	TF_Target
JUN	IL1A	TF_Target
JUN	IL6ST	TF_Target
JUN	MAPK14	TF_Target
JUN	MAPK9	TF_Target
JUN	NFE2L2	TF_Target
JUN	NOS2	TF_Target
JUN	NOS3	TF_Target
JUN	PLAT	TF_Target
JUN	PTEN	TF_Target
JUN	RELA	TF_Target
JUN	SIRT7	TF_Target
JUN	SLC9A1	TF_Target
JUN	SOCS1	TF_Target
JUN	STAT3	TF_Target
JUN	TICAM1	TF_Target
JUN	TLR4	TF_Target
JUN	TNF	TF_Target
miR-367-3p	ADM	miR_Target
miR-374c-5p	ADM	miR_Target
miR-92a-3p	ADM	miR_Target
miR-92b-3p	ADM	miR_Target
miR-27a-3p	ADORA2B	miR_Target
miR-143-3p	BCL2	miR_Target
miR-181c-5p	BCL2	miR_Target
miR-181d-5p	BCL2	miR_Target
miR-182-5p	BCL2	miR_Target
miR-200c-3p	BCL2	miR_Target
miR-204-5p	BCL2	miR_Target
miR-211-5p	BCL2	miR_Target
miR-30a-5p	BCL2	miR_Target
miR-30a-5p	BCL2	miR_Target
miR-30b-5p	BCL2	miR_Target
miR-30d-5p	BCL2	miR_Target
miR-30e-5p	BCL2	miR_Target
miR-374c-5p	BCL2	miR_Target
miR-17-5p	CDKN1A	miR_Target
miR-20a-5p	CDKN1A	miR_Target
miR-302a-3p	CDKN1A	miR_Target
miR-302b-3p	CDKN1A	miR_Target
miR-302d-3p	CDKN1A	miR_Target
miR-376c-3p	EDN1	miR_Target
miR-181c-5p	EGR1	miR_Target
miR-181d-5p	EGR1	miR_Target
miR-183-5p	EGR1	miR_Target
miR-191-5p	EGR1	miR_Target
miR-23a-3p	EGR1	miR_Target
miR-155-5p	FGF2	miR_Target
miR-214-5p	FGF2	miR_Target
miR-23a-3p	FGF2	miR_Target
miR-132-3p	HBEGF	miR_Target
miR-183-5p	HBEGF	miR_Target
miR-183-5p	HBEGF	miR_Target
miR-212-3p	HBEGF	miR_Target
miR-212-3p	HBEGF	miR_Target
miR-27a-3p	HBEGF	miR_Target
miR-29a-3p	HBEGF	miR_Target
miR-376c-3p	HBEGF	miR_Target
miR-760-3p	HBEGF	miR_Target
miR-135b-5p	HIF1A	miR_Target
miR-150-5p	HIF1A	miR_Target
miR-155-5p	HIF1A	miR_Target
miR-17-5p	HIF1A	miR_Target
miR-18a-5p	HIF1A	miR_Target
miR-19a-3p	HIF1A	miR_Target
miR-20a-5p	HIF1A	miR_Target
miR-330-3p	HIF1A	miR_Target
miR-367-3p	HIF1A	miR_Target
miR-92a-3p	HIF1A	miR_Target
miR-92b-3p	HIF1A	miR_Target
miR-27a-3p	IL10	miR_Target
miR-374b-5p	IL10	miR_Target
miR-181c-5p	IL1A	miR_Target
miR-181d-5p	IL1A	miR_Target
miR-30a-5p	IL1A	miR_Target
miR-30b-5p	IL1A	miR_Target
miR-30d-5p	IL1A	miR_Target
miR-30e-5p	IL1A	miR_Target
miR-30e-5p	IL1A	miR_Target
miR-130a-3p	IL6ST	miR_Target
miR-130b-3p	IL6ST	miR_Target
miR-148a-3p	IL6ST	miR_Target
miR-148b-3p	IL6ST	miR_Target
miR-19a-3p	IL6ST	miR_Target
miR-205-5p	IL6ST	miR_Target
miR-215-5p	IL6ST	miR_Target
miR-223-3p	IL6ST	miR_Target
miR-301a-3p	IL6ST	miR_Target
miR-301b-3p	IL6ST	miR_Target
miR-302c-3p	IL6ST	miR_Target
miR-330-3p	IL6ST	miR_Target
miR-19a-3p	MAPK14	miR_Target
miR-22-3p	MAPK14	miR_Target
miR-27a-3p	MAPK14	miR_Target
miR-19a-3p	MAPK8	miR_Target
miR-29a-3p	MAPK8	miR_Target
miR-30a-5p	MAPK8	miR_Target
miR-30b-5p	MAPK8	miR_Target
miR-30d-5p	MAPK8	miR_Target
miR-30e-5p	MAPK8	miR_Target
miR-367-3p	MAPK8	miR_Target
miR-92a-3p	MAPK8	miR_Target
miR-92b-3p	MAPK8	miR_Target
miR-182-5p	MYD88	miR_Target
miR-212-5p	MYD88	miR_Target
miR-3064-5p	MYD88	miR_Target
miR-144-3p	NFE2L2	miR_Target
miR-155-5p	NFE2L2	miR_Target
miR-27a-3p	NFE2L2	miR_Target
miR-144-3p	PLAT	miR_Target
miR-374b-5p	PLAT	miR_Target
miR-374c-5p	PLAT	miR_Target
miR-130a-3p	PPARG	miR_Target
miR-130b-3p	PPARG	miR_Target
miR-27a-3p	PPARG	miR_Target
miR-301a-3p	PPARG	miR_Target
miR-301b-3p	PPARG	miR_Target
miR-10a-5p	PTEN	miR_Target
miR-10b-5p	PTEN	miR_Target
miR-130a-3p	PTEN	miR_Target
miR-130b-3p	PTEN	miR_Target
miR-132-3p	PTEN	miR_Target
miR-144-3p	PTEN	miR_Target
miR-148a-3p	PTEN	miR_Target
miR-148b-3p	PTEN	miR_Target
miR-17-5p	PTEN	miR_Target
miR-181c-5p	PTEN	miR_Target
miR-181d-5p	PTEN	miR_Target
miR-18a-5p	PTEN	miR_Target
miR-193a-3p	PTEN	miR_Target
miR-193b-3p	PTEN	miR_Target
miR-19a-3p	PTEN	miR_Target
miR-200c-3p	PTEN	miR_Target
miR-20a-5p	PTEN	miR_Target
miR-212-3p	PTEN	miR_Target
miR-212-3p	PTEN	miR_Target
miR-22-3p	PTEN	miR_Target
miR-23a-3p	PTEN	miR_Target
miR-29a-3p	PTEN	miR_Target
miR-301a-3p	PTEN	miR_Target
miR-301b-3p	PTEN	miR_Target
miR-367-3p	PTEN	miR_Target
miR-374b-5p	PTEN	miR_Target
miR-92a-3p	PTEN	miR_Target
miR-92b-3p	PTEN	miR_Target
miR-143-3p	PTGS2	miR_Target
miR-144-3p	PTGS2	miR_Target
miR-1306-5p	RELA	miR_Target
miR-155-5p	RELA	miR_Target
miR-330-5p	RELA	miR_Target
miR-377-3p	SELE	miR_Target
miR-130a-3p	SIRT7	miR_Target
miR-130b-3p	SIRT7	miR_Target
miR-148a-3p	SIRT7	miR_Target
miR-148b-3p	SIRT7	miR_Target
miR-17-5p	SIRT7	miR_Target
miR-20a-5p	SIRT7	miR_Target
miR-301a-3p	SIRT7	miR_Target
miR-19a-3p	SLC9A1	miR_Target
miR-22-3p	SLC9A1	miR_Target
miR-367-3p	SLC9A1	miR_Target
miR-92a-3p	SLC9A1	miR_Target
miR-155-5p	SOCS1	miR_Target
miR-19a-3p	SOCS1	miR_Target
miR-222-3p	SOCS1	miR_Target
miR-30a-5p	SOCS1	miR_Target
miR-30b-5p	SOCS1	miR_Target
miR-30d-5p	SOCS1	miR_Target
miR-30e-5p	SOCS1	miR_Target
miR-331-3p	SOCS1	miR_Target
miR-17-5p	STAT3	miR_Target
miR-20a-5p	STAT3	miR_Target
miR-17-5p	TLR4	miR_Target
miR-182-5p	TLR4	miR_Target
miR-20a-5p	TLR4	miR_Target
miR-27a-3p	TLR4	miR_Target
miR-330-3p	TLR4	miR_Target
miR-330-5p	TLR4	miR_Target
miR-374b-5p	TLR4	miR_Target
miR-130a-3p	TNF	miR_Target
miR-130b-3p	TNF	miR_Target
miR-181c-5p	TNF	miR_Target
miR-181d-5p	TNF	miR_Target
miR-27a-3p	TNF	miR_Target
miR-27a-3p	TNF	miR_Target
miR-301a-3p	TNF	miR_Target
miR-301b-3p	TNF	miR_Target
ATF3	miR-200c-3p	TF_miR
ATF3	miR-22-3p	TF_miR
ATF3	miR-148a-3p	TF_miR
ATF3	miR-182-5p	TF_miR
ATF3	miR-193b-3p	TF_miR
ATF3	miR-10b-5p	TF_miR
ATF3	miR-10a-5p	TF_miR
ATF3	miR-20a-5p	TF_miR
ATF3	miR-132-3p	TF_miR
ATF3	miR-193a-3p	TF_miR
ATF3	miR-30a-5p	TF_miR
ATF3	miR-17-5p	TF_miR
ATF3	miR-29a-3p	TF_miR
ATF3	miR-760-3p	TF_miR
ATF3	miR-19a-3p	TF_miR
ATF3	miR-212-5p	TF_miR
ATF3	miR-92b-3p	TF_miR
ATF3	miR-191-5p	TF_miR
ATF3	miR-148b-3p	TF_miR
ATF3	miR-30b-5p	TF_miR
ATF3	miR-18a-5p	TF_miR
ATF3	miR-215-5p	TF_miR
ATF3	miR-1306-5p	TF_miR
ATF3	miR-144-3p	TF_miR
ATF3	miR-150-5p	TF_miR
ATF3	miR-212-3p	TF_miR
FOS	miR-204-5p	TF_miR
FOS	miR-331-3p	TF_miR
FOS	miR-148a-3p	TF_miR
FOS	miR-374b-5p	TF_miR
FOS	miR-330-3p.1	TF_miR
FOS	miR-193b-3p	TF_miR
FOS	miR-205-5p	TF_miR
FOS	miR-92a-3p	TF_miR
FOS	miR-374c-5p	TF_miR
FOS	miR-27a-3p	TF_miR
FOS	miR-20a-5p	TF_miR
FOS	miR-330-5p	TF_miR
FOS	miR-193a-3p	TF_miR
FOS	miR-330-3p.2	TF_miR
FOS	miR-23a-3p	TF_miR
FOS	miR-30a-5p	TF_miR
FOS	miR-211-5p	TF_miR
FOS	miR-301a-3p	TF_miR
FOS	miR-214-5p	TF_miR
FOS	miR-135b-5p	TF_miR
FOS	miR-212-5p	TF_miR
FOS	miR-30e-5p	TF_miR
FOS	miR-301b-3p	TF_miR
FOS	miR-222-3p	TF_miR
FOS	miR-30b-5p	TF_miR
FOS	miR-3064-5p	TF_miR
FOS	miR-130b-3p	TF_miR
FOS	miR-212-3p	TF_miR
JUN	miR-377-3p	TF_miR
JUN	miR-148a-3p	TF_miR
JUN	miR-181d-5p	TF_miR
JUN	miR-92a-3p	TF_miR
JUN	miR-132-3p	TF_miR
JUN	miR-302b-3p	TF_miR
JUN	miR-30a-5p	TF_miR
JUN	miR-29a-3p	TF_miR
JUN	miR-302d-3p	TF_miR
JUN	miR-212-5p	TF_miR
JUN	miR-92b-3p	TF_miR
JUN	miR-191-5p	TF_miR
JUN	miR-30e-5p	TF_miR
JUN	miR-223-3p	TF_miR
JUN	miR-376c-3p	TF_miR
JUN	miR-30d-5p	TF_miR
JUN	miR-215-5p	TF_miR
JUN	miR-1306-5p	TF_miR
JUN	miR-130b-3p	TF_miR
JUN	miR-212-3p	TF_miR
JUN	miR-143-3p	TF_miR
JUN	miR-27a-3p	TF_miR
JUN	miR-367-3p	TF_miR
JUN	miR-20a-5p	TF_miR
JUN	miR-302a-3p	TF_miR
JUN	miR-23a-3p	TF_miR
JUN	miR-130a-3p	TF_miR
JUN	miR-155-5p	TF_miR
JUN	miR-302c-3p	TF_miR
JUN	miR-760-3p	TF_miR
JUN	miR-19a-3p	TF_miR
JUN	miR-181c-5p	TF_miR
JUN	miR-183-5p.2	TF_miR
JUN	miR-148b-3p	TF_miR
JUN	miR-301b-3p	TF_miR
JUN	miR-30b-5p	TF_miR
JUN	miR-18a-5p	TF_miR
JUN	miR-183-5p	TF_miR
JUN	miR-144-3p	TF_miR

## Sheet: degree
target	degree
ALOX5	1
CCL3	1
IL1B	1
MMP9	1
NOS2	1
SULT1E1	1
ADORA2B	2
AGT	2
CASP3	2
CAV1	2
CCL2	2
HMOX1	2
LCN2	2
SELE	2
SOD1	2
SOD2	2
TICAM1	2
AKT1S1	3
CXCL2	3
MAPK9	3
NOS3	3
EDN1	4
GPX1	4
IL10	4
MYD88	4
PTGS2	4
PLAT	5
STAT3	5
ADM	6
CDKN1A	6
MAPK14	6
NFE2L2	6
PPARG	6
RELA	6
FGF2	7
SLC9A1	7
EGR1	8
IL1A	9
SIRT7	9
TLR4	9
TNF	9
MAPK8	10
SOCS1	10
HBEGF	12
BCL2	14
EGF	14
HIF1A	14
IL6ST	15
PTEN	31
